# Supplementary material
Source: PubMed Central journal article supplement (PMC5073220)
Supplement: Supp_Fig3.pdf [file Supp_Fig3.pdf]

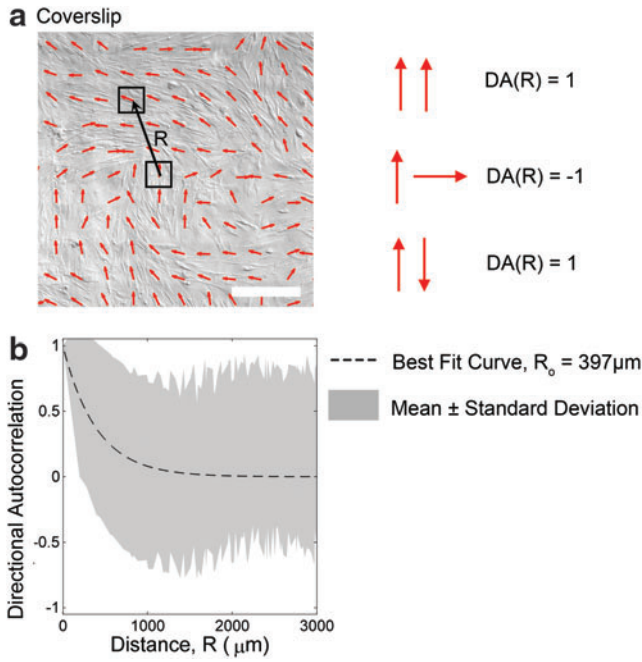

**SUPPLEMENTARY FIG. S3.** Cell orientation and spatial correlation length. **(a)** A large mosaic image of the cell colony was divided into smaller subimages. Scale bar:  $500\mu\text{m}$ . In each subimage, the principal orientation (*red arrows*) of the cells was found using an orientation algorithm described in the Methods section. Then, the directional autocorrelation between any two subimages was calculated. If the orientation is parallel,  $DA(R)=1$ , while if it is orthogonal,  $DA(R)=-1$ . **(b)** The directional autocorrelation was then plotted in terms of the distance between the two subimages,  $R$ . If the average value of  $DA(R)$  is 0, and the standard deviation of  $DA(R)$  is large, then at a distance  $R$ , cell orientation is the most uncorrelated since  $DA(R)$  is randomly distributed.
