# Supplementary material
Source: PubMed Central journal article supplement (PMC5073220)
Supplement: Supp_Fig5.pdf [file Supp_Fig5.pdf]

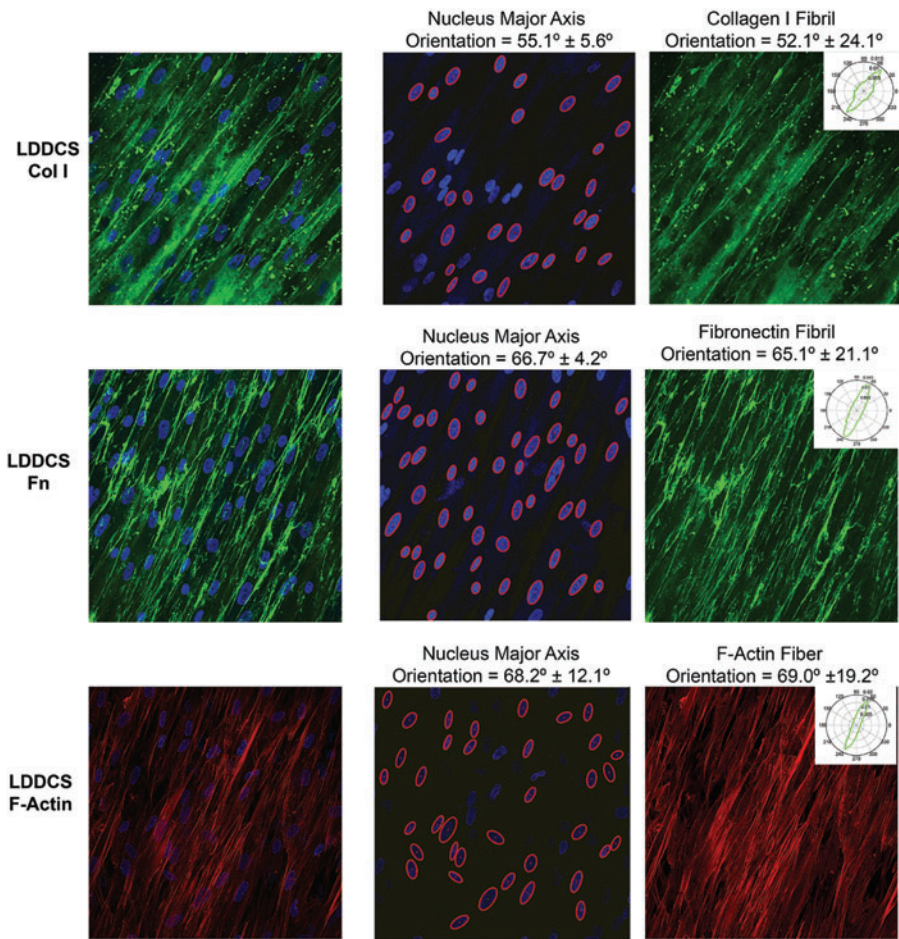

**SUPPLEMENTARY FIG. S5.** ECM (collagen I and fibronectin) and F-actin fiber orientation are within  $5^\circ$  to cell nucleus major axis orientation, suggesting the alignment of cell orientation and deposited ECM. ECM, extracellular matrix.
